# Supplementary material for: Multiomics approaches disclose very-early molecular and cellular switches during insect-venom allergen-specific immunotherapy: an observational study
Source: PubMed Central journal article supplement (PMC11599746; doi:10.1038/s41467-024-54684-2), 2024-11-26
Supplement: 41467_2024_54684_MOESM1_ESM.pdf [file 41467_2024_54684_MOESM1_ESM.pdf]

# 1 **Multiomics approaches disclose very-early molecular and cellular** 2 **switches during insect-venom allergen-specific immunotherapy: an** 3 **observational study**

## 4 **Supplementary Information**

5 Dimitrii Pogorelov<sup>1, 2, 18, #</sup>, Sebastian Felix Nepomuk Bode<sup>1, 3, 4, #</sup>, Xin He<sup>5, #</sup>, Javier Ramiro-Garcia<sup>5</sup>,  
6 Fanny Hedin<sup>6</sup>, Wim Ammerlaan<sup>7</sup>, Maria Konstantinou<sup>6</sup>, Christophe M. Capelle<sup>1, 2, 20</sup>, Ni Zeng<sup>1, 2</sup>,  
7 Aurélie Poli<sup>1, 19</sup>, Olivia Domingues<sup>1</sup>, Guillem Montamat<sup>1</sup>, Oliver Hunewald<sup>1</sup>, Séverine Ciré<sup>1</sup>, Alexandre  
8 Baron<sup>1</sup>, Joseph Longworth<sup>1, 5</sup>, Agnieszka Demczuk<sup>1, 2</sup>, Murilo Luiz Bazon<sup>1</sup>, Ingrid Casper<sup>8</sup>, Ludger  
9 Klimek<sup>8</sup>, Lorie Neuberger-Castillo<sup>7</sup>, Dominique Revets<sup>6</sup>, Lea Guyonnet<sup>1, 9</sup>, Sylvie Delhalle<sup>1</sup>, Jacques  
10 Zimmer<sup>1</sup>, Vladimir Benes<sup>10</sup>, Françoise Codreanu-Morel<sup>11</sup>, Christiane Lehnert-Weber<sup>11</sup>, Ilse Weets<sup>12</sup>,  
11 Pinar Alper<sup>5</sup>, Dirk Brenner<sup>1, 5, 13</sup>, Jan Gutermuth<sup>14</sup>, Coralie Guerin<sup>1, 9</sup>, Martine Morisset<sup>11, 15</sup>, François  
12 Hentges<sup>11</sup>, Reinhard Schneider<sup>5</sup>, Mohamed H. Shamji<sup>16</sup>, Fay Betsou<sup>7, 17</sup>, Paul Wilmes<sup>2, 5</sup>, Enrico  
13 Glaab<sup>5</sup>, Antonio Cosma<sup>6</sup>, Jorge Goncalves<sup>5</sup>, Feng Q. Hefeng<sup>1, \*</sup>, Markus Ollert<sup>1, 13, \*</sup>

14 <sup>1</sup>, Department of Infection and Immunity, Luxembourg Institute of Health (LIH), Esch-sur-Alzette,  
15 Luxembourg

16 <sup>2</sup>, Department of Life Sciences and Medicine, Faculty of Science, Technology and Medicine, University of  
17 Luxembourg, Esch-sur-Alzette, Luxembourg

18 <sup>3</sup>, Department of Pediatrics and Adolescent Medicine, Ulm University Medical Center, Ulm, Germany

19 <sup>4</sup>, Department of General Pediatrics, Adolescent Medicine and Neonatology, Medical Centre–University of  
20 Freiburg, Faculty of Medicine, Freiburg, Germany

21 <sup>5</sup>, Luxembourg Centre for Systems Biomedicine, University of Luxembourg, Belvaux, Luxembourg

22 <sup>6</sup>, National Cytometry Platform, Luxembourg Institute of Health, Esch-sur-Alzette, Luxembourg

23 <sup>7</sup>, Integrated BioBank of Luxembourg, Luxembourg Institute of Health, Dudelange, Luxembourg

24 <sup>8</sup>, Center for Rhinology and Allergology, Wiesbaden, Germany

25 <sup>9</sup>, Cytometry Platform, Institut Curie; Innovative Therapies in Haemostasis, INSERM, Université de Paris,  
26 Paris, France

27 <sup>10</sup>, Genomics Core Facility, European Molecular Biology Laboratory, Heidelberg, Germany

28 <sup>11</sup>, National Unit of Immunology-Allergology, Centre Hospitalier de Luxembourg, Luxembourg, Luxembourg

29 <sup>12</sup>, Department of Clinical Biology/ Research Group Experimental Pharmacology, Vrije Universiteit Brussel,  
30 Universitair Ziekenhuis Brussel, Brussels, Belgium

31 <sup>13</sup>, Department of Dermatology and Allergy Center, Odense Research Center for Anaphylaxis, University of  
32 Southern Denmark, Odense, Denmark

33 <sup>14</sup>, Department of Dermatology, Vrije Universiteit Brussel, Universitair Ziekenhuis Brussel, Brussels,  
34 Belgium

35 <sup>15</sup>, Allergy Unit, Angers University Hospital, Angers, France

36 <sup>16</sup>, Immunomodulation and Tolerance Group, Allergy and Clinical Immunology, Department of National  
37 Heart and Lung Institute, Imperial College London, London, UK

38 <sup>17</sup>, CRBIP, Institut Pasteur, Université Paris Cité, Paris, France

39 <sup>18</sup>, Present address: Center of Allergy & Environment, Technical University of Munich, Munich, Germany

40 <sup>19</sup>, Present address: Department of Cancer Research, Luxembourg Institute of Health, Luxembourg,  
41 Luxembourg

42 <sup>20</sup>, Present Address: Institute of Microbiology, ETH Zurich, Zurich, Switzerland

43 #, These authors contributed equally.

44 \*, These authors jointly supervised this work. Correspondence to F.Q.H. ([Feng.Hefeng@lih.lu](mailto:Feng.Hefeng@lih.lu)) or M.O.  
45 ([Markus.Ollert@lih.lu](mailto:Markus.Ollert@lih.lu)).

46

# 47 Supplementary Figures

48

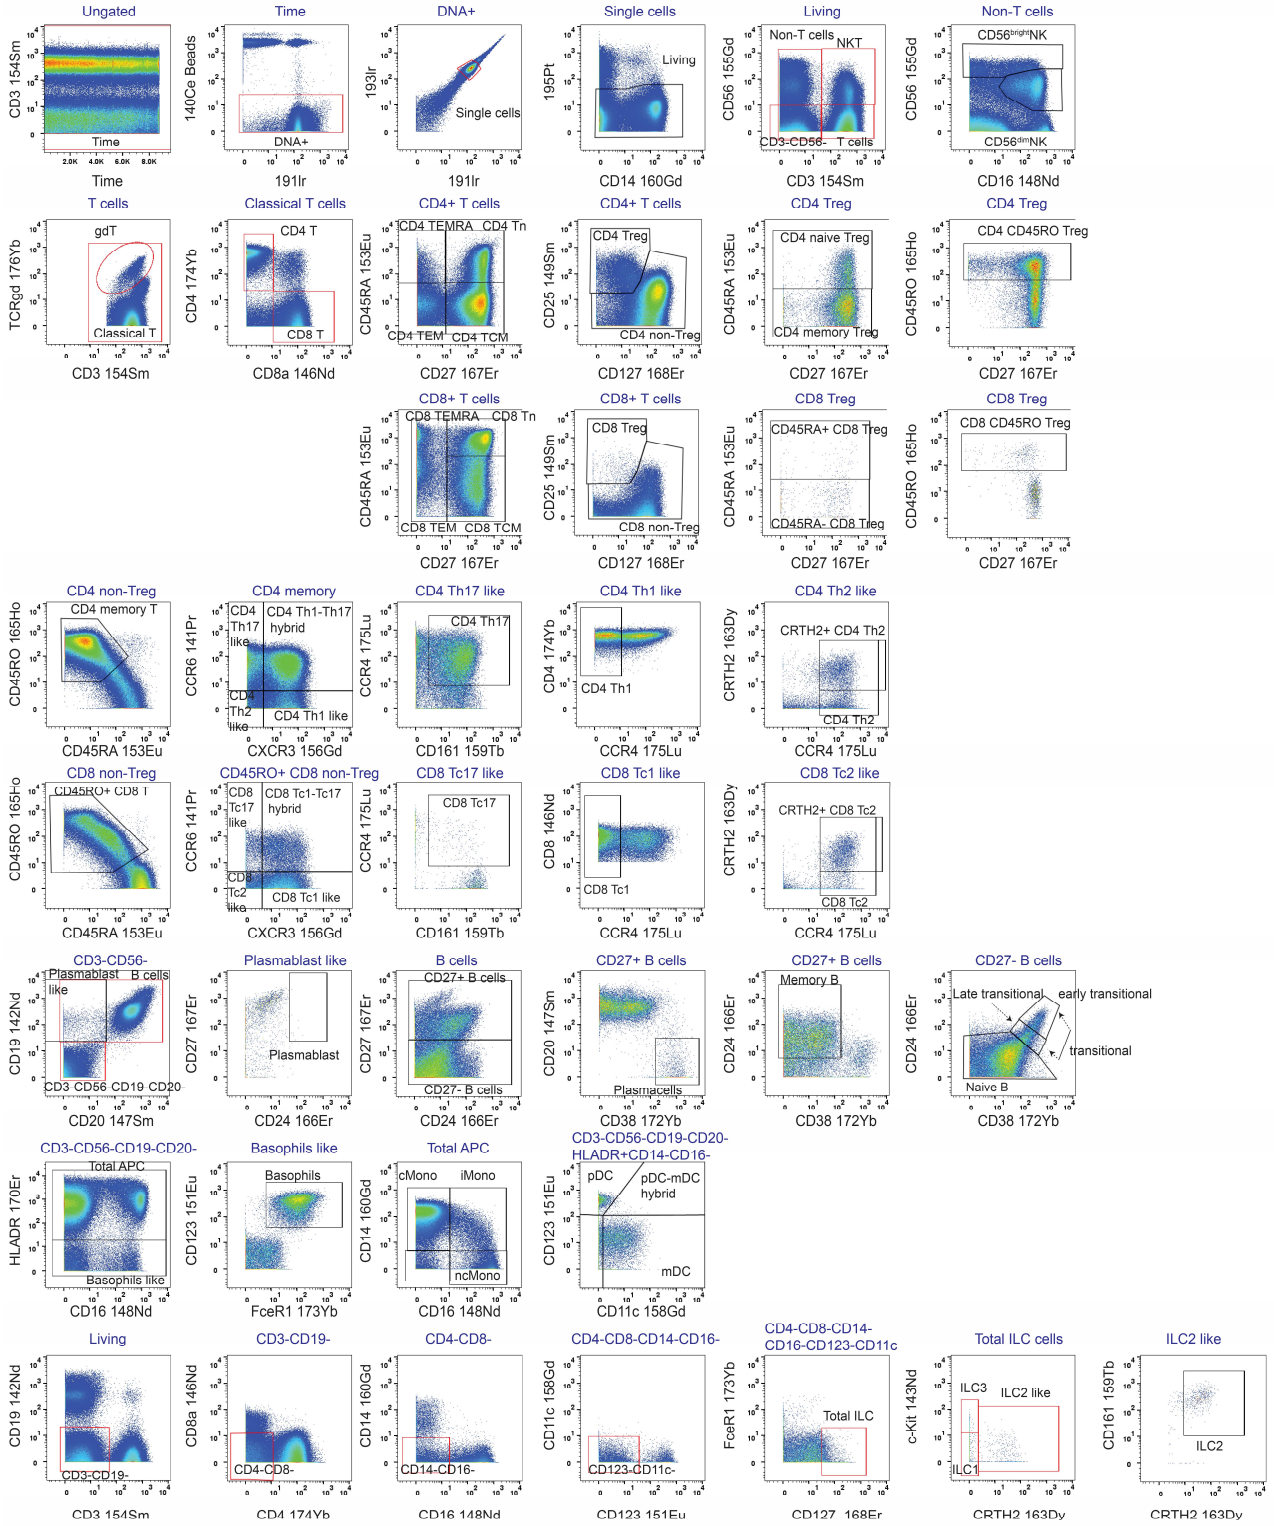

49

50

51 **Supplementary Fig. 1. CyTOF gating strategy to identify 77 peripheral**  
52 **immune subsets.**

53 Gating strategy to define various immune subsets in peripheral blood mononuclear cells (PBMCs)  
54 using manually-gated supervised mass cytometry (CyTOF) analysis. The labels and markers of  
55 major immune cell types of interests were enlarged. The corresponding parent gate was labeled in  
56 blue above each cytometry plot. APC, antigen presenting cells; CD4<sup>+</sup> Th1, type 1 helper T cells;  
57 CD4<sup>+</sup> Th2, type 2 helper T cells; CD8<sup>+</sup> Tc2, type 2 cytotoxic cells; DC, dendritic cells;  $\gamma\delta$  T cells,  
58 gamma-delta T cells; ILC1/2/3, type 1/2/3 innate lymphoid cells; cMono, classical monocytes; iMono,  
59 intermediate monocytes; ncMono, non-classical monocytes; NK, natural killer cells; NKT, natural  
60 killer T cells; non-Treg, non-regulatory T cells; mDC, myeloid DC; pDC, plasmacytoid DC; pDC-mDC,  
61 hybrid plasmacytoid and myeloid DC; CD8<sup>+</sup> Tc1, type 1 cytotoxic cells; Tc1-Tc17, hybrid type 1 and  
62 type 17 cytotoxic CD8<sup>+</sup> T cells; Th1-Th17, hybrid type 1 and type 17 CD4<sup>+</sup> T helper cells; TCM,  
63 central memory T cells; TEM, effector memory T cells; TEMRA, terminally-differentiated effector  
64 memory T cells; Tn, naïve T cells; Treg, regulatory T cells. The combinations of markers used to  
65 define the 77 subsets were provided as part of Source Data. For the full gating strategy, one could  
66 visit [https://public.tableau.com/app/profile/lihpublicdata/viz/i3Dare\\_SYSTACT\\_Database/SYSTACTHome](https://public.tableau.com/app/profile/lihpublicdata/viz/i3Dare_SYSTACT_Database/SYSTACTHome).

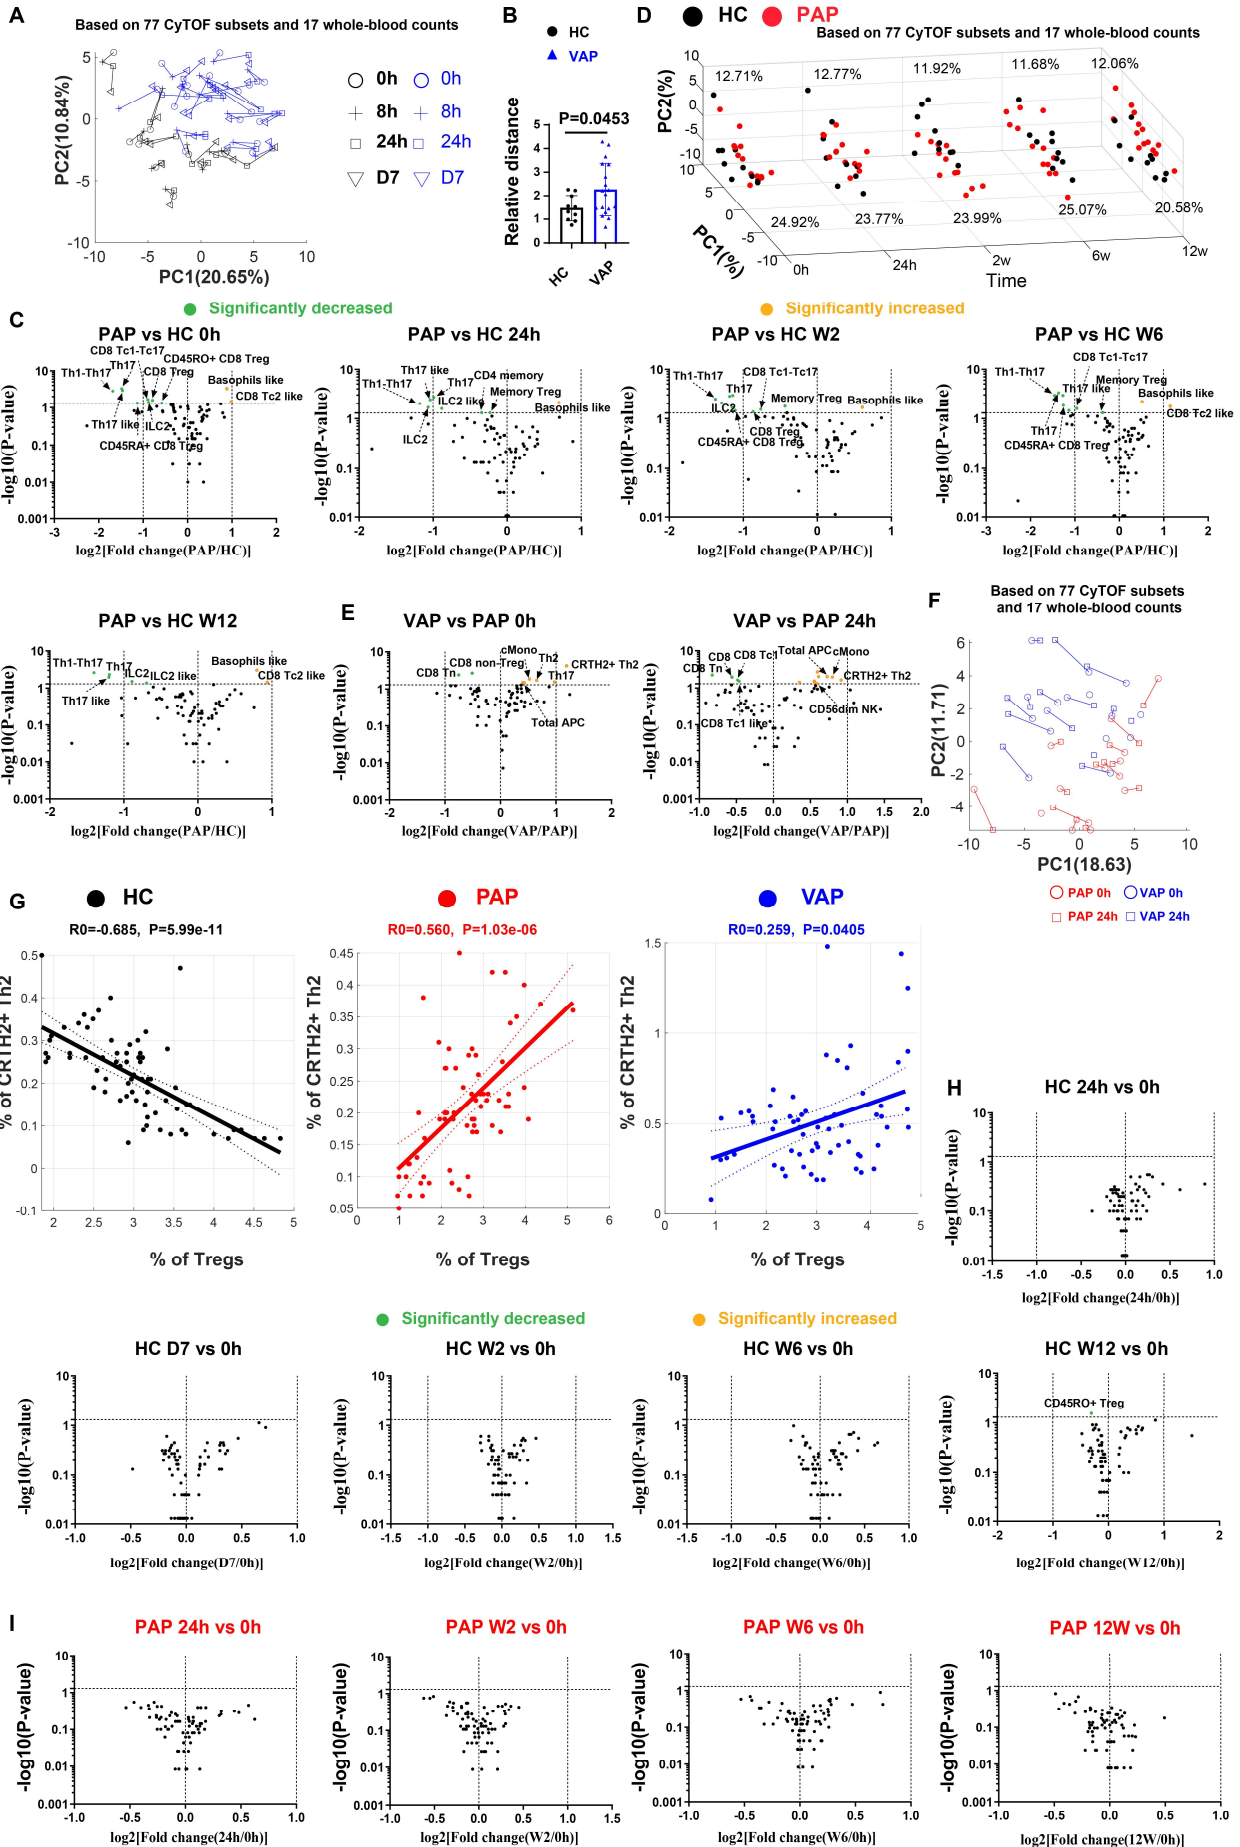



68 **Supplementary Fig. 2. Extended deep immunophenotyping analysis.**

69 **A**, PCA plot of the samples from VAP and HC. **B**, Average immunological response within VAP  
70 following AIT launch vs. HC among the four sampling time points. **C**, Percentages of different  
71 immune subsets in PAP vs. HC at the matched time points. The list of significantly enhanced  
72 or decreased immune subsets ( $p \leq 0.05$ ) were highlighted. **D**, Time-slice PCA plot of the  
73 samples from PAP and HC. The analysis was performed by integrating CyTOF and whole-blood-  
74 count results. **E**, Percentages of different immune subsets in VAP vs. PAP at the two matched  
75 time points. **F**, PCA plot showing the samples from different time points of VAP and PAP. **G**,  
76 Spearman correlation between the percentages of CRTH2<sup>+</sup> Th2 and of Tregs among total living  
77 singlets (HC, n=70; VAP, n=63; PAP, n=66 independent biological samples). **H**, **I**,  
78 Percentages of different immune subsets in HC (**H**) or PAP (**I**) at the indicated later time points vs.  
79 baseline. The significantly enhanced or decreased immune subsets ( $p \leq 0.05$ ) were highlighted.  
80 Data represent mean  $\pm$  S.D. (**B**). P-value was determined by paired (**H**, **I**) or non-paired (**C**, **E**) two-  
81 tailed Mann-Whitney test or a two-tailed exact permutation distribution test (**G**). Each dot in **A**, **D**, **F**,  
82 **G** represents one sample. Each dot in **B** represents one individual. The different samples from the  
83 same individual were connected with one line (**A**, **F**). AIT, allergen-specific immunotherapy; APC,  
84 antigen presenting cells; cMono, classical monocytes; DC, dendritic cells; ILC, innate lymphoid  
85 cells; NK, natural killer cells; NKT, natural killer T cells; TCM, central memory T cells; CD8<sup>+</sup> Tc1,  
86 type 1 cytotoxic cells; CD8<sup>+</sup> Tc2, type 2 cytotoxic cells; Tc1-Tc17, hybrid type 1 and type 17  
87 cytotoxic CD8<sup>+</sup> T cells; Th1-Th17, hybrid type 1 and type 17 CD4<sup>+</sup> T helper cells; TEM, effector  
88 memory T cells; TEMRA, terminally-differentiated effector memory T cells; Tn, naïve T  
89 cells; Treg, regulatory T cells. CyTOF, mass cytometry; PCA, Principal component analysis.  
90 For all the panels except for **G**, HC, healthy controls (n=10 independent individuals); PAP,  
91 pollen allergy patients (n=16 independent individuals); VAP, venom allergy patients  
92 (n=18 independent individuals). Source data are provided as a Source Data file.

93

94

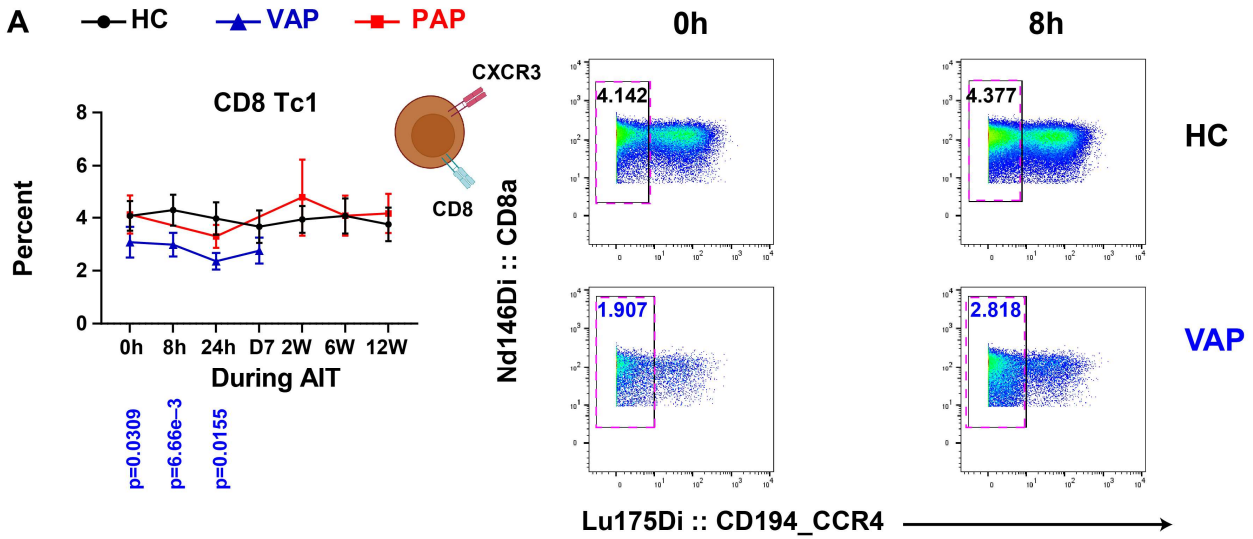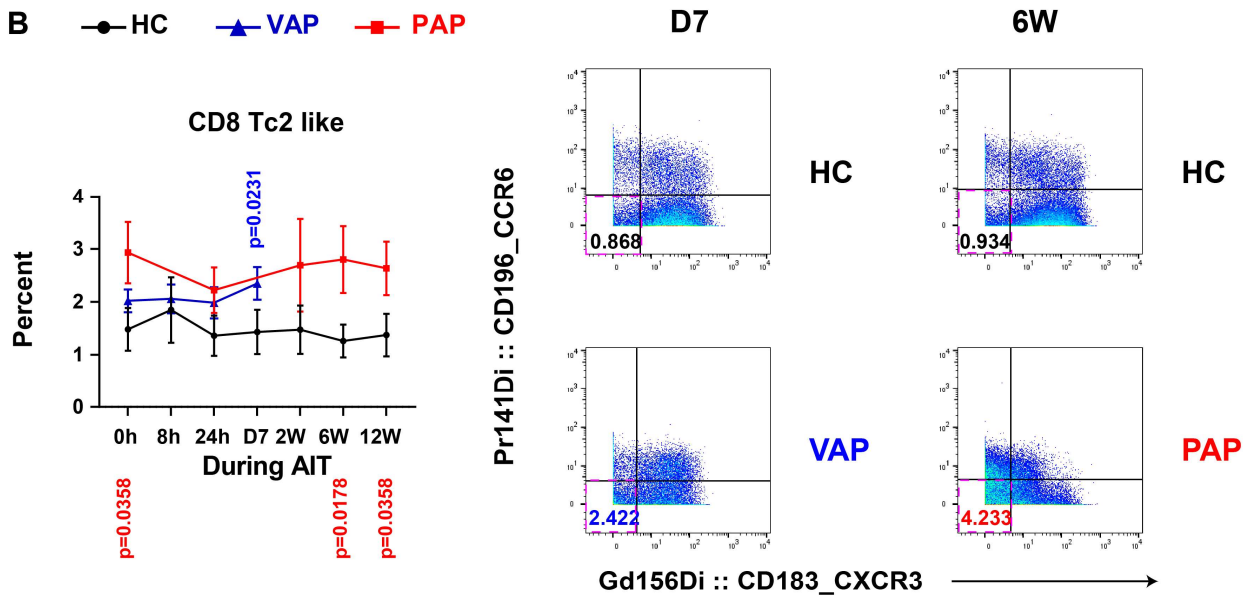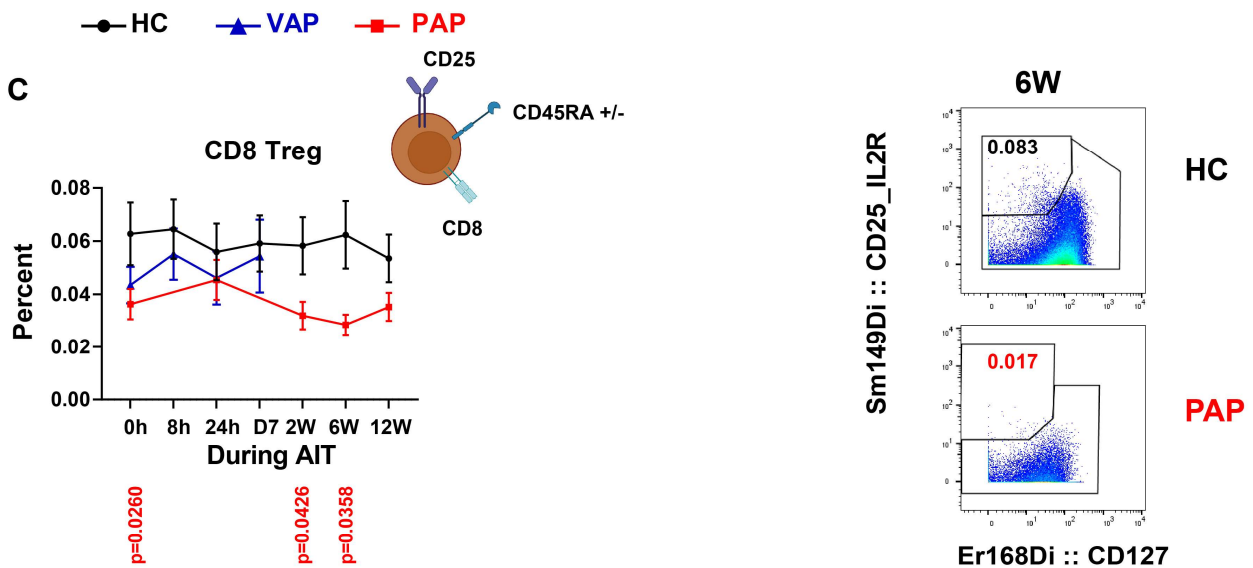

96 **Supplementary Fig. 3. CD8<sup>+</sup> subset dynamic responses in allergy**  
97 **patients during the initiation phase of AIT.**

98 **A-C**, Dynamical patterns of the percentages of CD8<sup>+</sup> Tc1 (**A**), CD8<sup>+</sup> Tc2-like (**B**) or CD8<sup>+</sup> Tregs (**C**)  
99 among total living singlets. Right panel, Representative cytometry plots of the indicated markers from  
100 VAP and/or PAP or HC at the indicated time points. Dashed purple frame represents the target  
101 gate. For CD8<sup>+</sup> Tc1 (CD8<sup>+</sup> non-Treg then CD45RA<sup>-</sup>CD45RO<sup>+</sup>CCR6<sup>-</sup>CXCR3<sup>+</sup>CCR4<sup>-</sup>): q=0.0416  
102 (0h), q=0.0269 (8h), q=0.0314 (D1) between VAP and HC (**A**); for the non-Treg gate, please  
103 refer to Supplementary Fig.1. For CD8<sup>+</sup> Tc2 like (CD8<sup>+</sup> non-Treg then CD45RA<sup>-</sup>CD45RO  
104 <sup>+</sup>CCR6<sup>-</sup>CXCR3<sup>-</sup>): q=0.0932 (D7) between VAP and HC (**B**); q=0.0603 (0h), q=0.0603 (W6),  
105 q=0.0603 (W12) between PAP and HC (**B**); For CD8<sup>+</sup> Tregs (CD8<sup>+</sup>CD25<sup>high</sup>CD127<sup>low</sup>):  
106 q=0.0717 (0h), q=0.0717 (W2), q=0.0717 (W6) between PAP and HC (**C**). Data represent mean±  
107 SEM. P-value was determined by non-paired two-tailed Mann-Whitney test (**A-C**). q values were  
108 generated using the two-stage step-up method (Benjamini, Krieger, and Yekutieli). The icon for the  
109 immune subset and its major markers used in our deep immunophenotyping analysis was  
110 provided for all the panels except for **B**. Unlabeled, not significant (p>0.05). AIT, allergen-  
111 specific immunotherapy; CD8<sup>+</sup> Tc1/2, type 1/2 cytotoxic cells; CD8<sup>+</sup> Tregs, CD8<sup>+</sup> regulatory T  
112 cells. For all the panels, HC, healthy controls (n=10 independent individuals); PAP, pollen allergy  
113 patients (n=16 independent individuals); VAP, venom allergy patients (n=18 independent  
114 individuals). Source data are provided as a Source Data file. Created in BioRender. Demczuk, A.  
(2024) [BioRender.com/g57p989](https://BioRender.com/g57p989) (panel **A, C**).

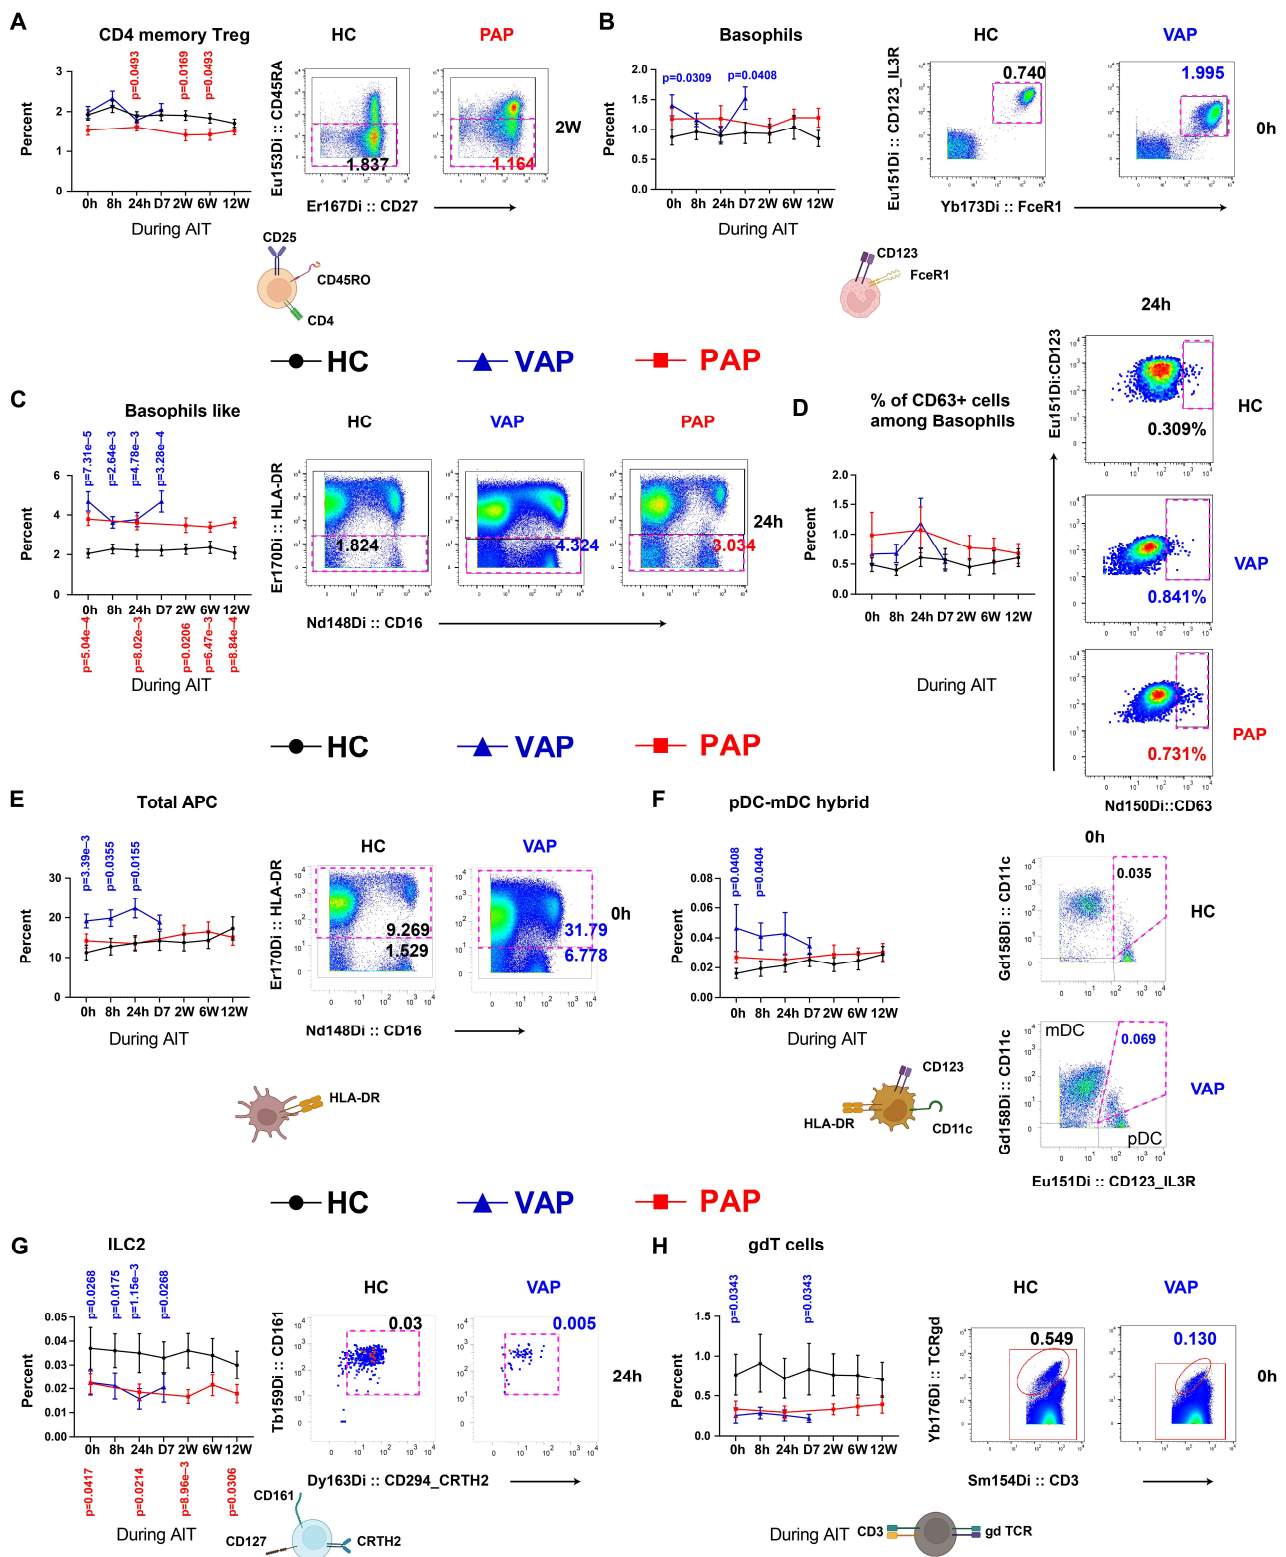

115

116 **Supplementary Fig. 4. Early dynamic responses of other peripheral**  
 117 **immune subsets in allergy patients following AIT launch.**

118 **A-C, E-H,** Percentages of CD4<sup>+</sup> memory Tregs (**A**), Basophils (**B**), Basophils-like (**C**), total APC  
 119 (**E**), pDC-mDC (**F**), ILC2 (**G**) or  $\gamma\delta$  T cells (**H**) among total living singlets of the participants from  
 120 various groups (VAP, PAP and HC). **D,** Percentages of CD63<sup>+</sup> cells among basophils. Right panel,

121 Representative cytometry plots of the expression of indicated markers from VAP (and/or PAP) and  
122 HC at 24h. Dashed purple frame represents the target gate. CD4<sup>+</sup> memory Tregs (CD3<sup>+</sup>γδ  
123 T<sup>-</sup>CD4<sup>+</sup>CD25<sup>high</sup>CD127<sup>low</sup>CD45RA<sup>-</sup>): q=0.0830 (24h), q=0.0830 (W2), q=0.0830 (W6) between PAP  
124 and HC (**A**); Basophils (CD3<sup>-</sup>CD56<sup>-</sup>CD19<sup>-</sup>CD20<sup>-</sup>HLA-DR<sup>-</sup>CD123<sup>+</sup>FceR1<sup>+</sup>): q=0.0825 (0h) and  
125 q=0.0825 (D7) between VAP and HC (**B**); Basophils like (CD3<sup>-</sup>CD56<sup>-</sup>CD19<sup>-</sup>CD20<sup>-</sup>HLA-DR<sup>-</sup>):  
126 q=2.95e-4 (0h), q=3.55e-3 (8h), q=4.83e-3 (24h), q=6.62e-4 (D7) between VAP and HC (**C**);  
127 q=1.34e-3 (0h), q=6.08e-3 (D1), q=0.0125 (W2), q=6.08E-3 (W6), q=1.34e-3 (W12) between PAP  
128 and HC (**C**); Total APC (CD3<sup>-</sup>CD56<sup>-</sup>CD19<sup>-</sup>CD20<sup>-</sup>HLA-DR<sup>+</sup>): q=0.0137 (0h), q=0.0478 (8h),  
129 q=0.0314 (24h) between VAP and HC (**E**); hybrid pDC-mDC cells: (CD3<sup>-</sup>CD56<sup>-</sup>CD19<sup>-</sup>CD20<sup>-</sup>HLA-  
130 DR<sup>+</sup>CD14<sup>-</sup>CD16<sup>-</sup>CD123<sup>+</sup>CD11c<sup>+</sup>) among total living singlets. q=0.0825 (0h), q=0.0825 (8h)  
131 between VAP and HC (**F**); ILC2  
132 (CD4<sup>-</sup>CD8<sup>-</sup>CD14<sup>-</sup>CD16<sup>-</sup>CD123<sup>-</sup>CD11c<sup>-</sup>FceR1<sup>-</sup>CD127<sup>+</sup>CD161<sup>+</sup>CRTH2<sup>+</sup>): q=0.0203 (0h),  
133 q=0.0203 (8h), q=3.49e-3 (24h) q=0.0203 (D7) between VAP and HC (**G**); q=0.0527 (0h), q=0.0515  
134 (24h), q=0.0452 (W2), q=0.0515 (W12) between PAP and HC (**G**); γδ T cells (CD3<sup>+</sup>γδT<sup>+</sup>): q=0.0559  
135 (0h), q=0.0559 (8h), q=0.0559 (24h), q=0.0559 (D7) between VAP and HC (**H**). Data represent  
136 mean± SEM. P-value was determined by non-paired two-tailed Mann-Whitney test (**A-H**). q values  
137 were generated using two-stage step-up method (Benjamini, Krieger, and Yekutieli). Unlabelled, not  
138 significant (p>0.05). AIT, allergen-specific immunotherapy; APC, antigen presenting cells; ILC2, type  
139 2 innate lymphoid cells; γδ T cells, gamma-delta T cells; pDC-mDC, hybrid plasmacytoid and myeloid  
140 DC; Treg, regulatory T cells. For panel **A-G**, HC, healthy controls (n=10 independent individuals);  
141 PAP, pollen allergy patients (n=16 independent individuals); VAP, venom allergy patients (n=18  
142 independent individuals). For γδ T cells in panel **H**, due to staining issues the analyzed sample size  
143 at various time points is very different from that of other cell types (for the precise n number at  
144 different time points, please refer to Source Data and [i3Dare](#)). Source data are provided as a Source  
145 Data file. Created in BioRender. Demczuk, A. (2024) [BioRender.com/x44j225](#) (panel **A, B, E-H**).



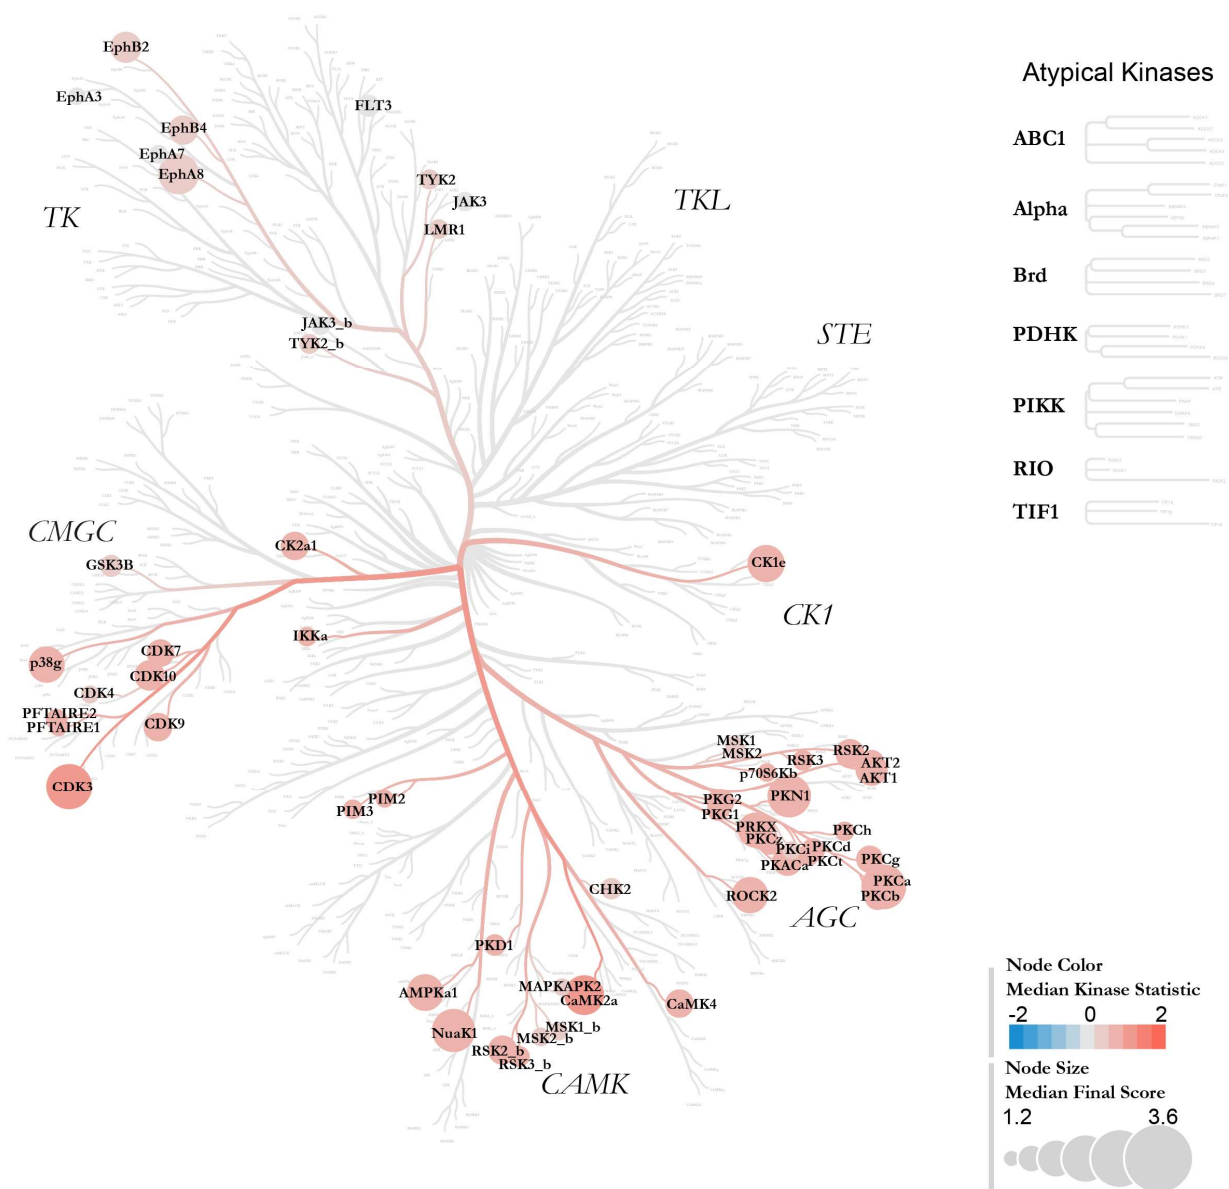

146

147 **Supplementary Fig. 5. Human kinome analysis in VAP at 8h following**  
 148 **AIT launch.**

149 The PamGene kinome tree showed significantly changed kinases in PBMC depleted of CD4<sup>+</sup> T  
 150 cells in VAP at 8h vs. baseline immediately following AIT launch. In total, ~ 350 unique human  
 151 kinases were measured. Only the nodes showing a Median Final Score (representing  
 152 confidence of the observation) >1.2 (the typical PamGene threshold) were marked with enlarged  
 153 kinase label(s). The other kinases were only shown in small gray labels. The Median Kinase  
 154 Statistic represents the direction of effect. Selected participants per group (n=9 independent  
 155 participants; for the selection rationale, refer to Methods). For a zoomed-in view, please refer to  
 156 Figure 4. For analysis details, refer to Methods. AIT, allergen-specific immunotherapy; VAP,  
 venom allergy patients.

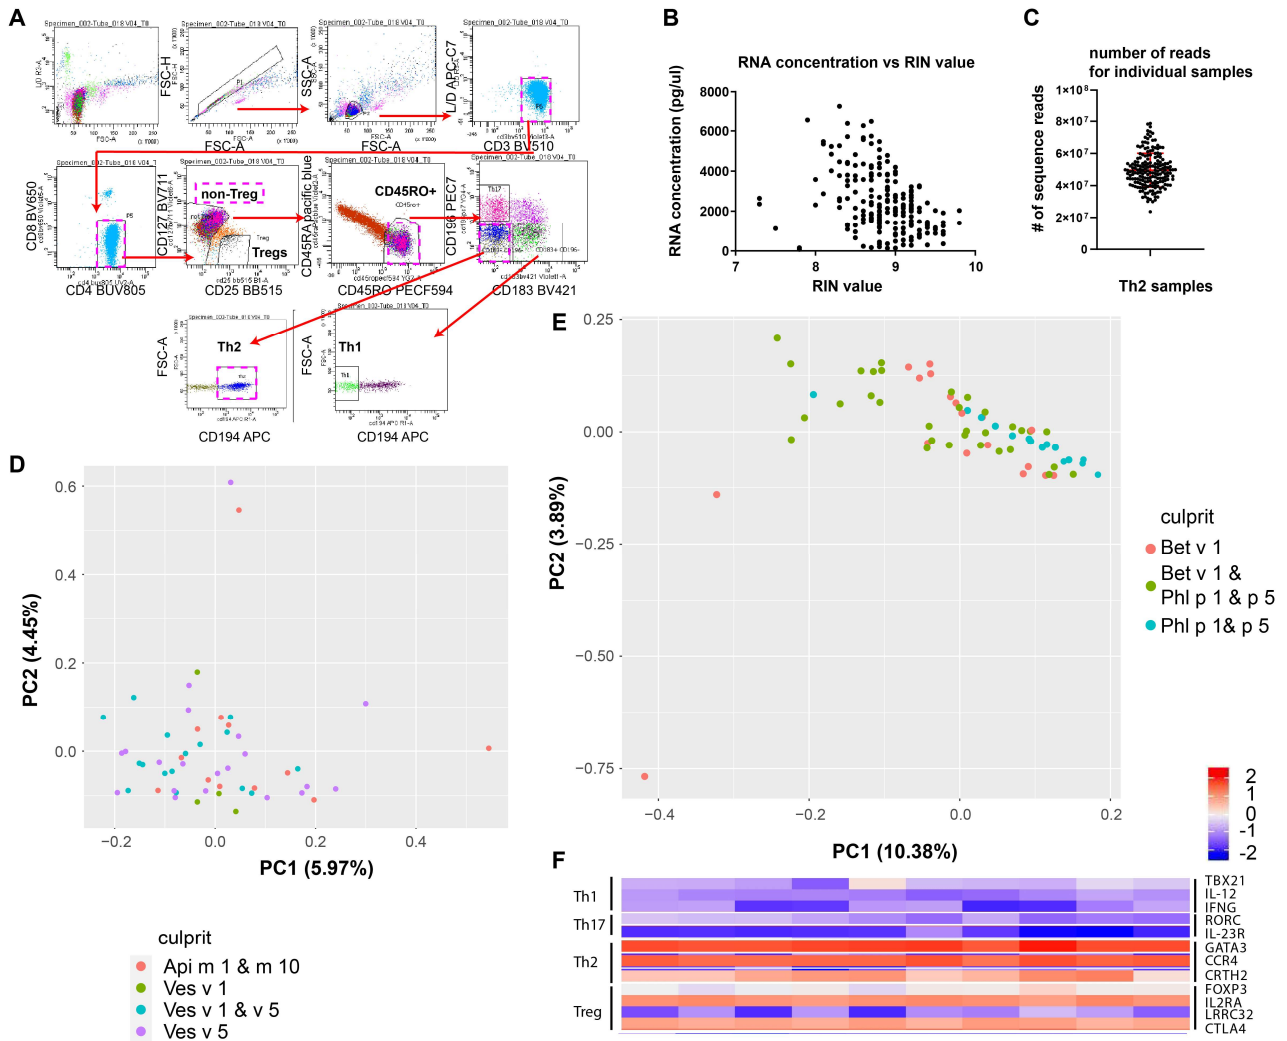

157

158 **Supplementary Fig. 6. High-quality Th2-cell-type-specific RNA-seq**  
 159 **analysis.**

160 **A**, FACS-sorting strategy to define living CD4<sup>+</sup> Th2 singlets (CD3<sup>+</sup>CD4<sup>+</sup>CD8<sup>-</sup> non-Treg then  
 161 CD45RO<sup>+</sup>CD45RA<sup>-</sup>CD183/CXCR3<sup>-</sup>CD196/CCR6<sup>-</sup>CD194/CCR4<sup>+</sup>). For the non-Treg gate, please  
 162 refer to Supplementary Fig.1. For detailed marker and sorting configuration information, please refer  
 163 to Supplementary Table 4. Of note, our specific configuration using both V460/36 and V427/10 in  
 164 our sorter allowing us to distinguish the fluorochromes pacific blue and BV421. Dashed purple  
 165 rectangle was used to highlight a few gates or subsets. **B**, RNA integrity number (RIN) vs. RNA  
 166 concentration of each individual RNA-seq sample (n=201 independent biological replicates). Each  
 167 dot represents one individual sample. **C**, Distribution of the number of sequence reads (~50 million  
 168 reads/sample) of individual Th2 RNA-seq samples (mean±SD) (n=187 independent biological  
 169 replicates). **D, E**, PCA plot using the genome-scale RNA-seq datasets shows that there existed no  
 170 culprit-allergen bias in the dataset of VAP (**D**) or PAP (**E**). **F**, Heatmap showing that known Th2-

171 specific (but not Th1- , Th17- or Treg-specific) marker genes were highly expressed in 10 randomly-  
172 selected independent biological samples. FACS, fluorescence-activated Cell Sorting; PCA, Principal  
173 component analysis; PC1/2, the first or second principal component. PAP, pollen allergy  
174 patients; VAP, venom allergy patients. Th1, CD4<sup>+</sup> type 1 helper T cells; Th2, CD4<sup>+</sup> type 2 helper T  
175 cells; Th17, CD4<sup>+</sup> type 17 helper T cells; Treg, CD4<sup>+</sup> regulatory T cells. Source data are  
176 provided as a Source Data file.

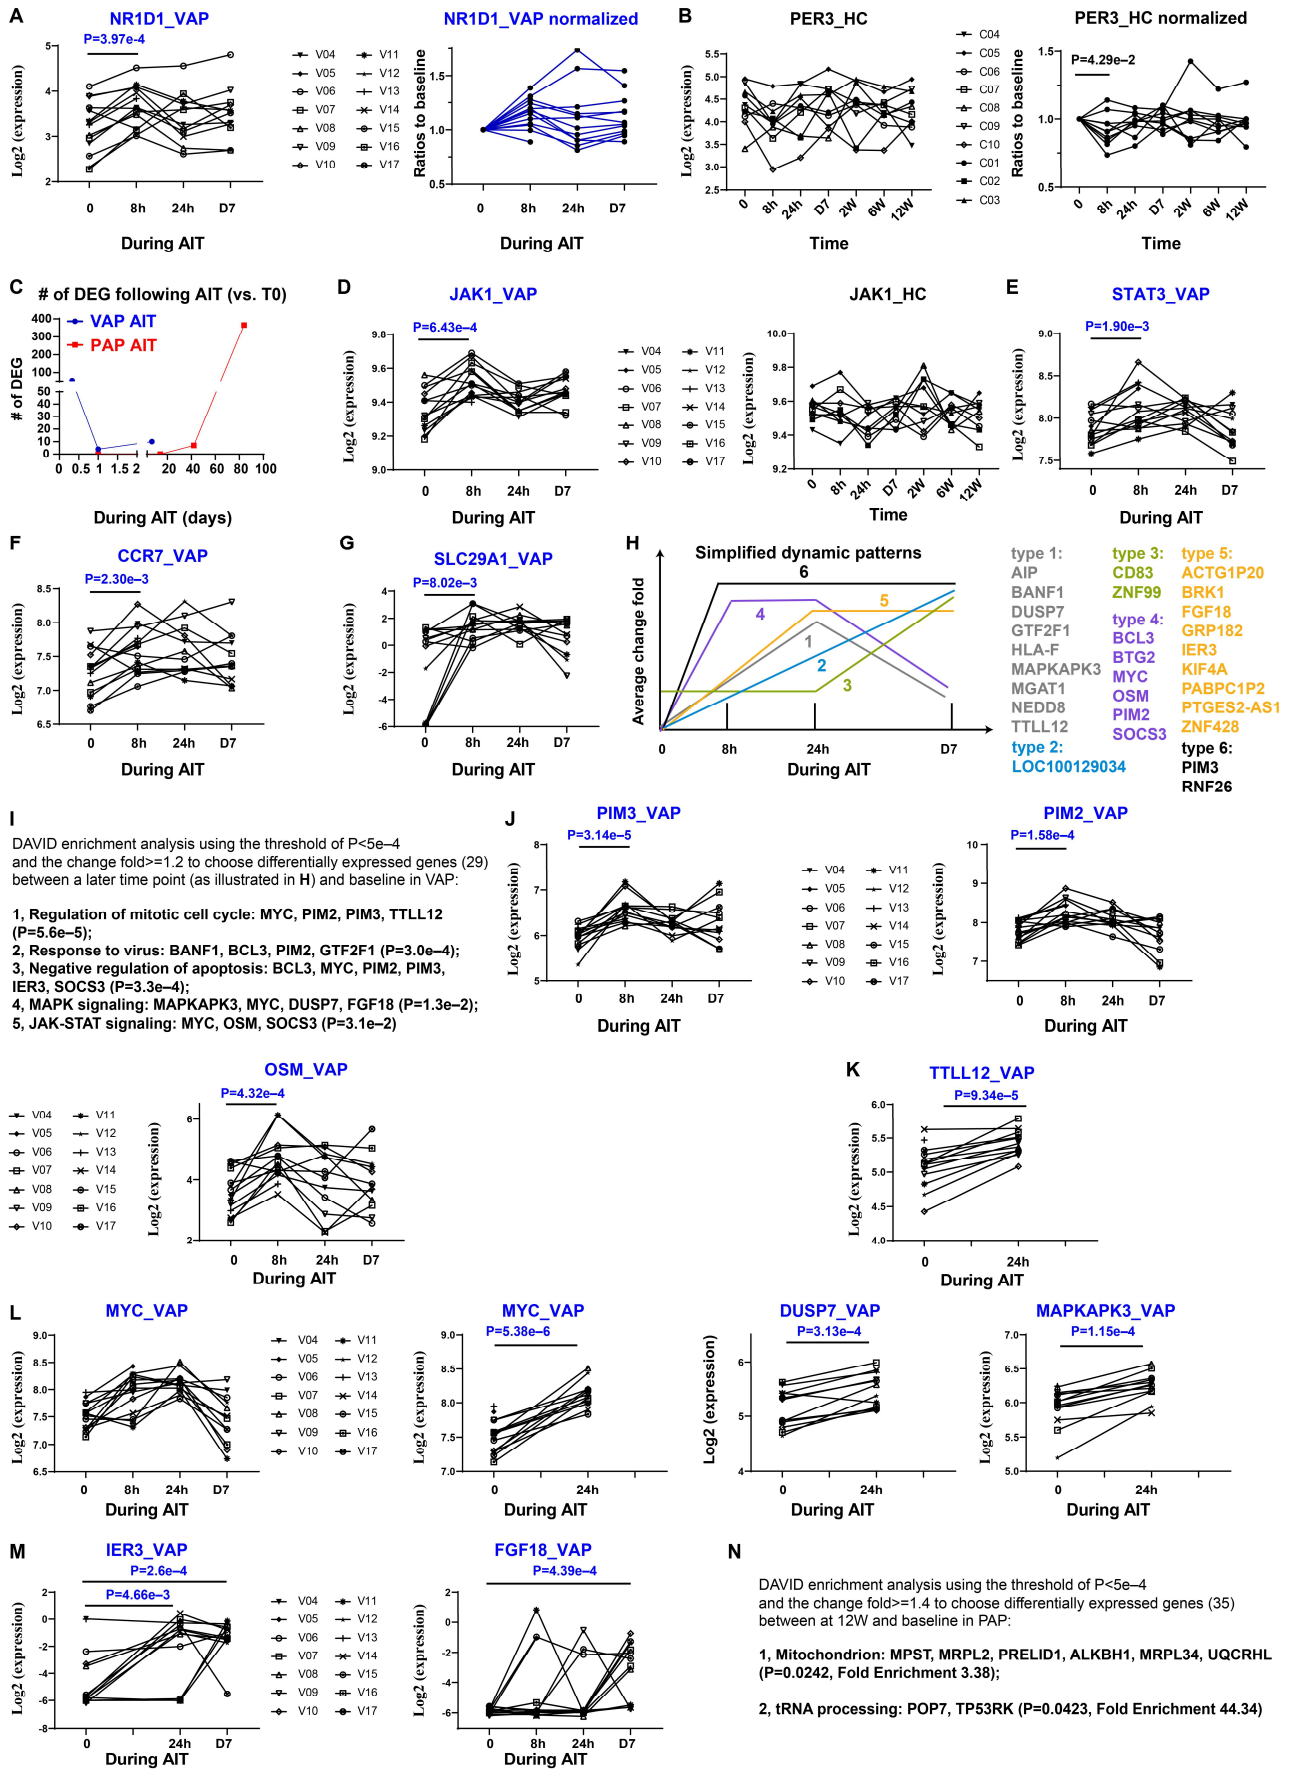

178 **Supplementary Fig. 7. Extended Th2-cell-type-specific RNA-seq**  
179 **analysis.**

180 **A**, mRNA expression of *NR1D1* in sorted Th2 cells. Right, Expression of *NR1D1* normalized to  
181 baseline. **B**, mRNA expression of *PER3*. Right, Expression of *PER3* normalized to baseline. **C**,  
182 Number of differentially-expressed genes (DEG) in Th2 cells at the given time point vs. baseline. **D**,  
183 mRNA expression of *JAK1* from VAP (left) or HC (right). **E, F, G**, mRNA expression of *STAT3* (**E**),  
184 *CCR7* (**F**) and *SLC29A1* (**G**). **H**, Six types of mRNA upregulation patterns in VAP following AIT. For  
185 the genes exhibiting a gradually-increasing pattern, the fold change between peak-time and baseline  
186 was at least 1.2 and showed a highly-significant P value ( $\leq 5e-4$ ). For the genes exhibiting an  
187 increased plateau, the fold change between time points at the plateau and baseline was at least 1.2  
188 and showed a highly-significant P value ( $\leq 5e-4$ ) for at least one-time at the plateau. Of note, *S1PR1*  
189 was not listed here because it only peaked at 8h. **I, N**, DAVID enrichment analysis  
190 (<https://david.ncifcrf.gov/tools.jsp>, 2021) showing the top-ranked enriched pathways or processes  
191 among the genes with a significant change between a later time point (as defined in **H**) and  
192 baseline in VAP (**I**). The analysis was also performed for the upregulated genes (as defined in the  
193 panel) between W12 and baseline in PAP (**N**). **J**, mRNA expression of *PIM2*, *PIM3* and *OSM* from  
194 VAP. **K, L**, Uniform upregulation of *TLL12* (**K**), *MYC*, *DUSP7* and *MAPKAPK3* (**L**) transcripts in  
195 VAP at 24h vs baseline. Of note, the expression of *MYC* was also displayed at all the time  
196 points during AIT (left). **M**, mRNA expression of *IER3* and *FGF18* within VAP. To avoid the  
197 message dilution, the values of *IER3* at 8h were not displayed. Samples from different time points  
198 of the same individual are connected with one line. P values in **A, B, D-G, J-M** were  
199 determined by paired two-tailed Student's *t* test. For all the panels, HC, healthy controls, n=10  
200 independent individuals; PAP, pollen allergy patients, n=14 independent individuals; VAP,  
201 venom allergy patients, n=14 independent individuals. AIT, allergen-specific immunotherapy;  
202 Th2, CD4<sup>+</sup> type 2 helper T cells. Source data are provided as a Source Data file.

203

204

205

206



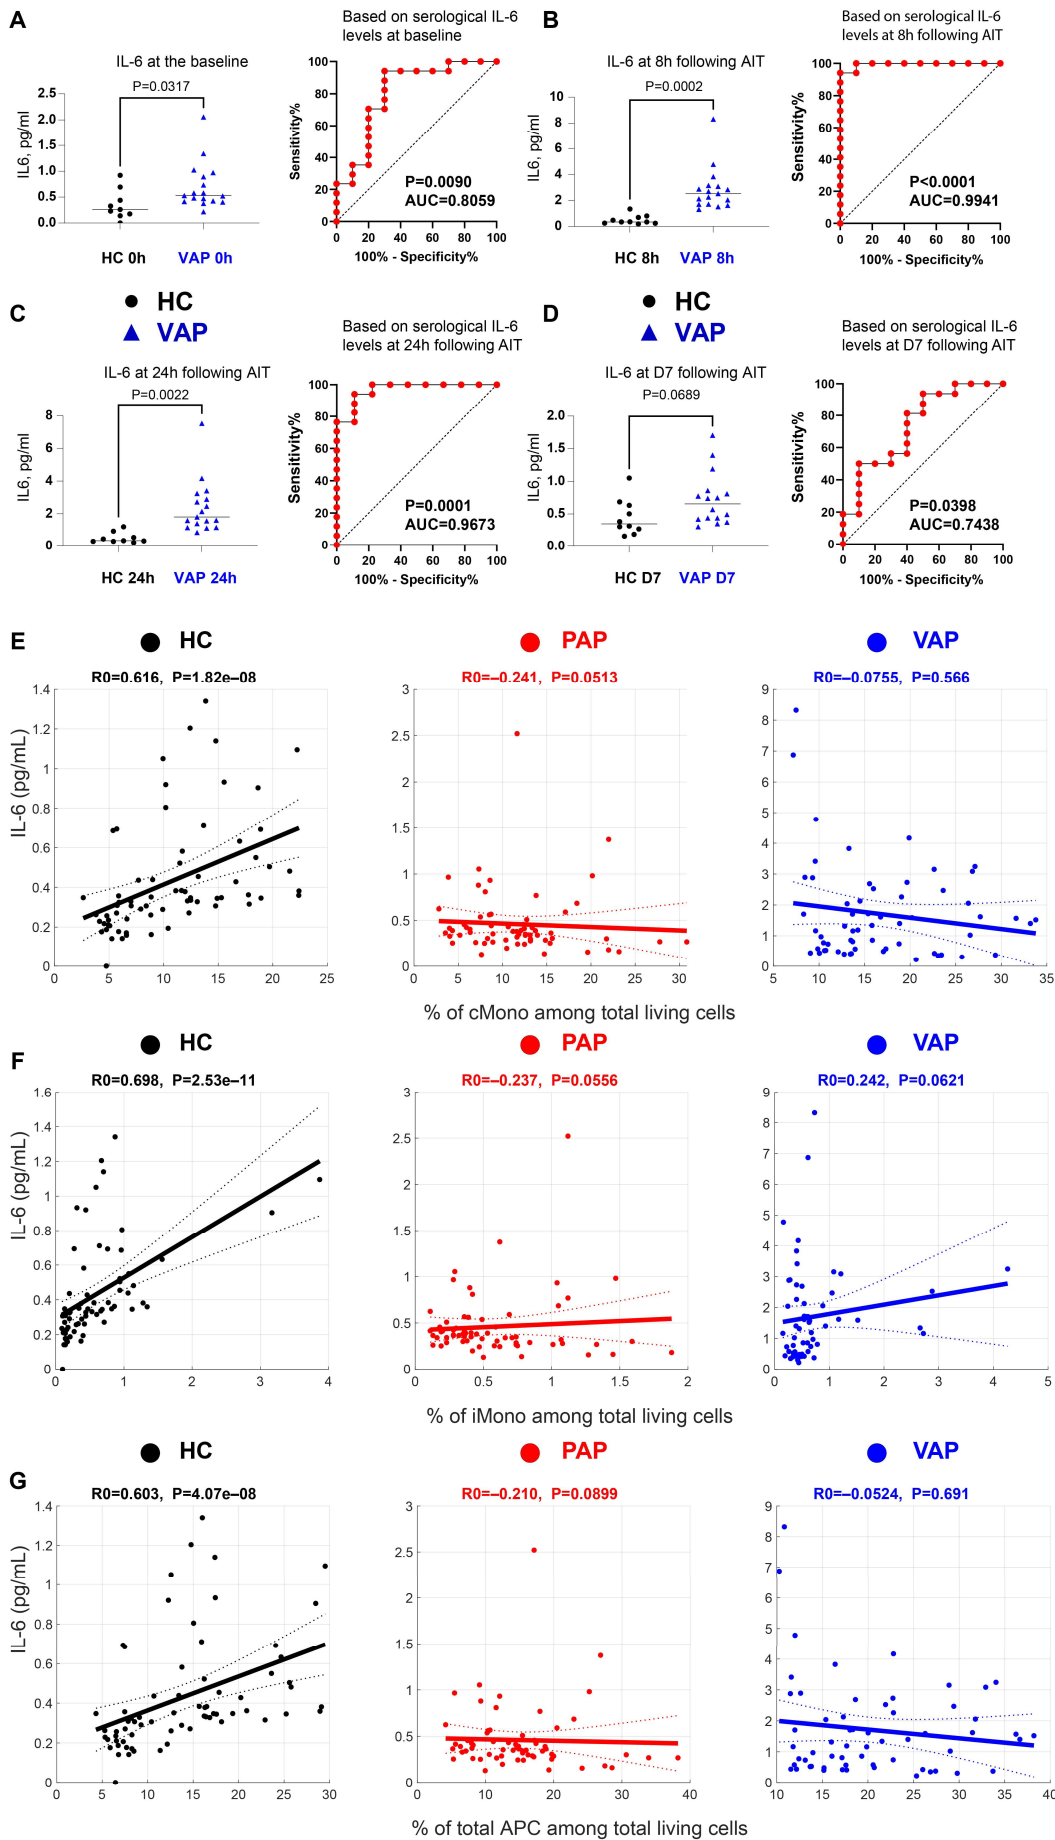

208 **Supplementary Fig. 8. Serological IL-6 is an early AIT-responsive**  
209 **biomarker in VAP and the balance between IL-6 and APC subsets are**  
210 **disturbed in both patient groups.**

211 **A-D**, ROC analysis based on serological IL-6 levels at baseline (**A**, HC, n=10; VAP, n=17  
212 independent individuals), 8h (**B**, HC, n=10; VAP, n=17 independent individuals), 24h (**C**, HC, n=9;  
213 VAP, n=17 independent individuals) or D7 (**D**, HC, n=10; VAP, n=16 independent individuals)  
214 following AIT launch in VAP vs IL-6 levels at the matched time points in HC without AIT  
215 administration. Left panel showing the group comparison at the indicated time point, where the  
216 median is labelled for each group. **E-G**, Spearman correlation between the percentages of  
217 cMono (CD14<sup>+</sup>CD16<sup>-</sup>, **E**, HC, n=69; VAP, n=60; PAP, n=66 independent biological samples),  
218 iMono (CD14<sup>dim</sup>CD16<sup>dim</sup>, **F**, HC, n=69; VAP, n=60; PAP, n=66 independent biological samples) or  
219 total APC (CD3<sup>-</sup>CD56<sup>-</sup>CD19<sup>-</sup>CD20<sup>-</sup>HLA-DR<sup>+</sup>, **G**, HC, n=69; VAP, n=60; PAP, n=66 independent  
220 biological samples) and circulating IL-6 levels within HC, PAP and VAP. For the full gating  
221 strategy, please refer to Supplementary Fig.1 and the i3Dare website. The samples from all the  
222 time points were included in the analysis of the given group. P values were generated with a  
223 two-tailed exact permutation distribution test (**E-G**). P-value in the group comparison was  
224 generated using a two-tailed unpaired Student's *t* test while P-value from the ROC analysis tests  
225 the null hypothesis that the area under the curve really equals 0.50 with a two-tailed test (**A-D**).  
226 Each dot represents one independent biological sample at the given time point [the  
227 corresponding sample size n for each group is specified for each panel above]. AIT, allergen-  
228 specific immunotherapy; APC, antigen-presenting cells; cMono, classical monocytes; iMono,  
229 intermediate monocytes. HC, Healthy controls; PAP, pollen allergy patients; VAP, venom allergy  
230 patients. Source data are provided as a Source Data file.

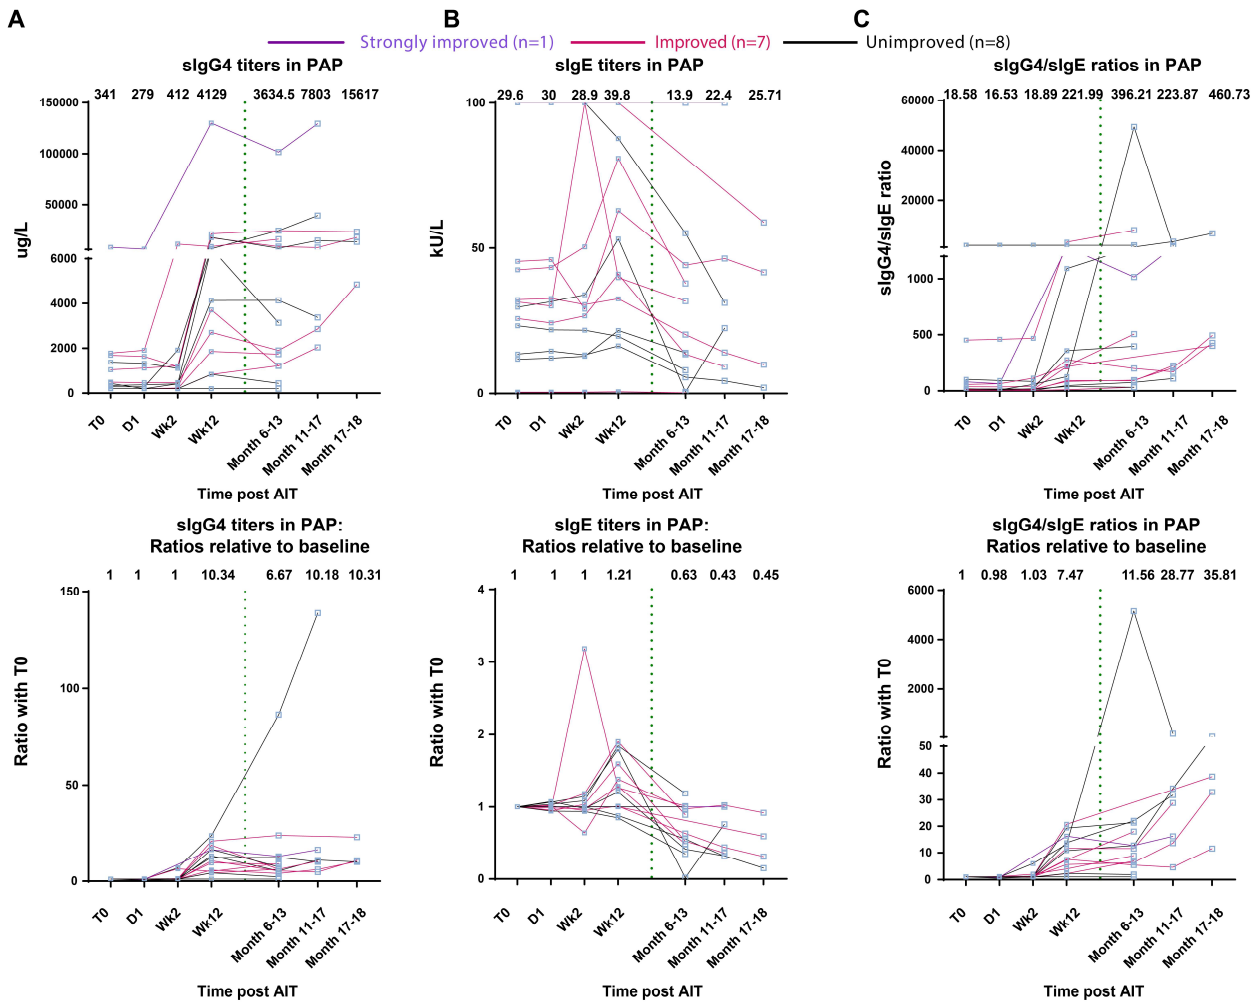

231

232 **Supplementary Fig. 9. AIT induces varying sIgG4 responses in PAP**  
 233 **independent of clinical outcomes.**

234 **A, B**, Titers of sIgG4 (**A**) and sIgE (**B**) against birch pollen allergen rBet v 1 following AIT launch in  
 235 pollen allergy patients (PAP). The dashed green line separates the long-term follow-up period from  
 236 the early stage of AIT. Of note, the strongly improved patient in **B** had the highest sIgE titers (100)  
 237 and showed a cut line in the upper panel. Lower panel in **A** and **B**, the values normalized to baseline.  
 238 **C**, The ratios between sIgG4 and sIgE. Each line links different samples of one individual patient.  
 239 Each rectangle represents one measurement of one individual at the given time point. Lower panel,  
 240 the values normalized to baseline. The median response level for the samples at the given time point  
 241 is provided. Strongly improved (n=1), improved (n=7) or unimproved (n=8) individual patients are  
 242 indicated by different colors. Of note, one PAP did not show a sIgG4 response against rBet v 1 in  
 243 the follow-up samples because the given patient was treated with grass pollen AIT (marked in Source  
 244 Data). For another PAP also treated with grass pollen AIT, no long-term follow-up samples were  
 245 available. AIT, allergen-specific immunotherapy. Source data are provided as a Source Data file.

246

247 **Supplementary Tables:**248 **Supplementary Table 1. Basic clinical and demographical information of**  
249 **the participants within the cohort.**

|                                                                            | HC<br>(median) | HC<br>(IQR <sup>€</sup> ) | PAP<br>(median) | PAP<br>(IQR<br>)        | VAP<br>(median) | VAP<br>(IQR)            | P-<br>value<br>betwe<br>en<br>PAP<br>and<br>HC <sup>€</sup> | P-<br>value<br>betwe<br>en<br>VAP<br>and<br>HC <sup>€</sup> |
|----------------------------------------------------------------------------|----------------|---------------------------|-----------------|-------------------------|-----------------|-------------------------|-------------------------------------------------------------|-------------------------------------------------------------|
| <b>Age (years)</b>                                                         | 34.5           | 30-38                     | 36.5            | 30.5-<br>42.5           | 48.5            | 36.7<br>5-<br>58.2<br>5 | 0.903<br>6                                                  | 0.009<br>107                                                |
| <b>BMI</b>                                                                 | 22.99          | 20.90-<br>24.21           | 23.28           | 22.2<br>1-<br>24.6<br>6 | 26.35           | 22.7<br>7-<br>29.3<br>7 | 0.253<br>391                                                | 0.067<br>085                                                |
| <b>Male%</b>                                                               | 10             |                           | 50              |                         | 61.1            |                         |                                                             |                                                             |
| <b>Smoking%</b>                                                            | 80             |                           | 6.25            |                         | 44.4            |                         |                                                             |                                                             |
| <b>Caucasian%</b>                                                          | 100            |                           | 81.25           |                         | 100             |                         |                                                             |                                                             |
| <b>Among 16 PAP, N (%)</b>                                                 |                |                           |                 |                         |                 |                         |                                                             |                                                             |
| <b>Initial diagnosis symptoms</b>                                          |                |                           |                 |                         |                 |                         |                                                             |                                                             |
| <b>Seasonal Allergic rhinoconjunctivitis (SARC) alone</b>                  |                |                           | 6 (37.5)        |                         |                 |                         |                                                             |                                                             |
| <b>SARC with Intermittent asthma (IAS) and Oral allergy syndrome (OAS)</b> |                |                           | 3 (18.75)       |                         |                 |                         |                                                             |                                                             |
| <b>SARC with Intermittent asthma (IAS)</b>                                 |                |                           | 3 (18.75)       |                         |                 |                         |                                                             |                                                             |
| <b>SARC with Oral allergy syndrome (OAS)</b>                               |                |                           | 3 (18.75)       |                         |                 |                         |                                                             |                                                             |
| <b>SARC with eosinophilic esophagitis (EOE)</b>                            |                |                           | 1(6.25)         |                         |                 |                         |                                                             |                                                             |
| <b>Disease duration</b>                                                    |                |                           |                 |                         |                 |                         |                                                             |                                                             |
| <b>Disease duration 1-5 years</b>                                          |                |                           | 9 (56.25)       |                         |                 |                         |                                                             |                                                             |
| <b>Disease duration 5-10 years</b>                                         |                |                           | 2 (12.5)        |                         |                 |                         |                                                             |                                                             |
| <b>Disease duration &gt;10 years</b>                                       |                |                           | 5 (31.25)       |                         |                 |                         |                                                             |                                                             |
| <b>Sensitizing allergens</b>                                               |                |                           |                 |                         |                 |                         |                                                             |                                                             |
| <b>Sensitized to Bet v 1</b>                                               |                |                           | 5 (31.25)       |                         |                 |                         |                                                             |                                                             |
| <b>Sensitized to Phl p 1 and Phl p 5</b>                                   |                |                           | 3 (18.75)       |                         |                 |                         |                                                             |                                                             |
| <b>Sensitized to</b>                                                       |                |                           | 8 (50)          |                         |                 |                         |                                                             |                                                             |

|                                                                     |  |  |            |  |                                          |  |  |  |
|---------------------------------------------------------------------|--|--|------------|--|------------------------------------------|--|--|--|
| Bet v 1, Phl p 1 and Phl p 5                                        |  |  |            |  |                                          |  |  |  |
| <b>AIT products</b>                                                 |  |  |            |  |                                          |  |  |  |
| AIT: Allergovit birch 100%                                          |  |  | 4 (25)     |  |                                          |  |  |  |
| AIT: Allergovit grass 100%                                          |  |  | 3 (18.75)  |  |                                          |  |  |  |
| AIT: Allergovit grass & birch                                       |  |  | 9 (56.25)  |  |                                          |  |  |  |
| <b>AIT duration and outcomes</b>                                    |  |  |            |  |                                          |  |  |  |
| Complete of full 3-5 year AIT                                       |  |  | 15 (93.75) |  |                                          |  |  |  |
| Not improved (CSMS) <sup>S</sup> -like score, <10% score reduction) |  |  | 8 (50)     |  |                                          |  |  |  |
| Improved (CSMS-like score, 10-25% score reduction)                  |  |  | 7 (43.75)  |  |                                          |  |  |  |
| Strongly improved (CSMS-like score, >25% score reduction)           |  |  | 1 (6.25)   |  |                                          |  |  |  |
| <b>Among 18 VAP, N (%)</b>                                          |  |  |            |  |                                          |  |  |  |
| <b>Initial diagnosis symptoms</b>                                   |  |  |            |  |                                          |  |  |  |
| Anaphylaxis Grade 1 (Mueller Grading <sup>y</sup> )                 |  |  |            |  | 7 (38.89)                                |  |  |  |
| Anaphylaxis Grade 2                                                 |  |  |            |  | 7 (38.89)                                |  |  |  |
| Anaphylaxis Grade 3                                                 |  |  |            |  | 4 (22.22)                                |  |  |  |
| <b>Sensitizing allergens</b>                                        |  |  |            |  |                                          |  |  |  |
| Sensitized to Ves v 1                                               |  |  |            |  | 1 (5.56)                                 |  |  |  |
| Sensitized to Ves v 5                                               |  |  |            |  | 8 (44.4)                                 |  |  |  |
| Sensitized to both Ves v 1 and Ves v 5                              |  |  |            |  | 5 (27.78)                                |  |  |  |
| Sensitized to Api m 1                                               |  |  |            |  | 1 (5.56)                                 |  |  |  |
| Sensitized to Api m 1 and Api m 10                                  |  |  |            |  | 3 (16.67)                                |  |  |  |
| <b>AIT products</b>                                                 |  |  |            |  |                                          |  |  |  |
| AIT: Pharmalgen ALK wasp                                            |  |  |            |  | 14 (77.8)                                |  |  |  |
| AIT: Pharmalgen ALK bee                                             |  |  |            |  | 4 (22.2)                                 |  |  |  |
| <b>AIT duration and outcomes</b>                                    |  |  |            |  |                                          |  |  |  |
| Complete of full 3-5 year AIT                                       |  |  |            |  | 17 (94.44)                               |  |  |  |
| Field Sting(s) without systemic reaction                            |  |  |            |  | 9 out of 9 reported in 6 patients (100%) |  |  |  |
| Negative skin test at termination                                   |  |  |            |  | 1 (not among the 6 field stung patients) |  |  |  |



250

251 Notes:

252 £, IQR: 25%-75% percentile (inclusive).

253 €, P-value was based on non-paired two-tailed Student's *t* test without the adjustment for multiple  
254 comparisons.255 γ, Symptom severity degree defined by the 4-scale Mueller Grading; 4 indicates the most severe  
256 symptoms while 0 indicates no systemic reaction after a sting (for reference, please refer to  
257 Methods).

258 §, Combined Symptom Medication Score (CSMS) (for reference, please refer to Methods).

259

260

**Supplementary Table 2. The list of CyTOF Abs used in this work.**

| Metal Isotope | target        | Amount (µl) | Clone  | Manufacturer | Catalogue | LOT (If more than one batch, we provide all) |
|---------------|---------------|-------------|--------|--------------|-----------|----------------------------------------------|
| 154Sm         | CD3           | 1           | UCHT1  | Fluidigm#    | 3154003B  | 0151806                                      |
| 174Yb         | CD4           | 1           | SK3    | Fluidigm     | 3174004B  | 2351715                                      |
| 146Nd         | CD8A          | 1           | RPA-T8 | Fluidigm     | 3146001B  | 1671716                                      |
| 209Bi         | CD11B         | 1           | ICRF44 | Fluidigm     | 3209003B  | 0831723                                      |
| 160Gd         | CD14          | 1           | M5E2   | Fluidigm     | 3160001B  | 3261702                                      |
| 164Dy         | CD15 (SSEA-1) | 1           | W6D3   | Fluidigm     | 3164001B  | 1421725                                      |
| 148Nd         | CD16          | 1           | 3G8    | Fluidigm     | 3148004B  | 2511709                                      |
| 142Nd         | CD19          | 1           | HIB19  | Fluidigm     | 3142001B  | 0171815                                      |
| 147Sm         | CD20          | 1           | 2H7    | Fluidigm     | 3147001B  | 2491705                                      |
| 166Er         | CD24          | 1           | ML5    | Fluidigm     | 3166007B  | 2651709                                      |
| 149Sm         | CD25 (IL-2R)  | 1           | 2A3    | Fluidigm     | 3149010B  | 1931712                                      |
| 167Er         | CD27          | 1           | L128   | Fluidigm     | 3167006B  | 3501404                                      |
| 172Yb         | CD38          | 1           | HIT2   | Fluidigm     | 3172007B  | 1931716                                      |
| 171Yb         | CD44          | 0.1         | IM7    | Fluidigm     | 3171003B  | 1931725,<br>3421608                          |
| 89Y           | CD45          | 1           | HI30   | Fluidigm     | 3089003B  | 3421702                                      |
| 165Ho         | CD45RO        | 1           | UCHL1  | Fluidigm     | 3165011B  | 1421721                                      |
| 153Eu         | CD45RA        | 1           | HI100  | Fluidigm     | 3153001B  | 0641506,<br>641506                           |
| 155Gd         | CD56 (NCAM)   | 1           | B159   | Fluidigm     | 3155008B  | 2771704,<br>1471501                          |
| 150Nd         | CD63          | 1           | H5C6   | Fluidigm     | 3150021B  | 1801513                                      |
| 152Sm         | CD66b         | 1           | 80H3   | Fluidigm     | 3152011B  | 3491401                                      |
| 144Nd         | CD69          | 1           | FN50   | Fluidigm     | 3144018B  | 3041705                                      |
| 143Nd         | CD117 (cKit)  | 1           | 104D2  | Fluidigm     | 3143001B  | 1711722                                      |

|              |                                 |   |               |                          |            |                    |
|--------------|---------------------------------|---|---------------|--------------------------|------------|--------------------|
| <b>151Eu</b> | CD123 (IL-3R)                   | 1 | 6H6           | Fluidigm                 | 3151001B   | 2291711            |
| <b>168Er</b> | CD127 (IL-7A)                   | 1 | A019D5        | Fluidigm                 | 3168017B   | 0541706            |
| <b>145Nd</b> | CD138                           | 1 | DL-101        | Fluidigm                 | 3145003B   | 2651706            |
| <b>159Tb</b> | CD161                           | 1 | HP-3G10       | Fluidigm                 | 3159004B   | 1361705            |
| <b>156Gd</b> | CD183 (CXCR3)                   | 1 | G025H7        | Fluidigm                 | 3156004B   | 2771708            |
| <b>175Lu</b> | CD194 <sup>&amp;</sup> (CCR4)   | 1 | 205410        | Fluidigm                 | 3175021A   | 2791705            |
| <b>141Pr</b> | CD196 (CCR6)                    | 1 | 11A9          | Fluidigm                 | 3141014A   | 0751705            |
| <b>163Dy</b> | CD294 (CRTH2)                   | 1 | BM16          | Fluidigm                 | 3163003B   | 1671717,<br>691605 |
| <b>170Er</b> | HLA-DR                          | 1 | L243          | Fluidigm                 | 3170013B   | 3571502            |
| <b>161Dy</b> | CD152 (CTLA4)                   | 1 | 14D3          | Fluidigm                 | 3161004B   | 2651711            |
| <b>169Tm</b> | CD30 <sup>*</sup>               | 1 | 81337         | R&D                      | MAB229     | Not available      |
| <b>158Gd</b> | CD11C <sup>*</sup>              | 1 | 3.9           | Biolegend                | 301639     | Not available      |
| <b>173Yb</b> | FceR1/ FCER1A <sup>*</sup>      | 1 | AER-37 (CRA1) | Thermo Fisher Scientific | 16-5899-82 | Not available      |
| <b>176Yb</b> | TCR $\gamma\delta$ <sup>*</sup> | 1 | B1.1          | Thermo Fisher Scientific | 16-9959-81 | Not available      |

261

262 Notes:

263 \*, in-house conjugation using Maxpar X8 Antibody Labeling Kits.

264 &, this antibody was discontinued.

265 #, Fluidigm is now switched to Standard Bio.

266

267 **Supplementary Table 3. The list of other CyTOF kits used in this work.**

| Kit Component                          | Manufacturer | Catalogue |
|----------------------------------------|--------------|-----------|
| Maxpar Thulium Chloride 169Tm—50 mM    | Fluidigm     | 201169A   |
| Maxpar Gadolinium Chloride 158Gd—50 mM | Fluidigm     | 201158A   |
| Maxpar Ytterbium Chloride 173Yb—50 mM  | Fluidigm     | 201173A   |
| Maxpar Ytterbium Chloride 176Yb—50 mM  | Fluidigm     | 201176A   |

268  
269

**Supplementary Table 4. The list of flow cytometry Abs and laser configuration used to sort Th2 cells of the participants.**

| Target                                            | Alternative name                     | Fluorochrome                | Clone     | Used volume ul/10 <sup>6</sup> cells | Catalogue, Manufacturer             |
|---------------------------------------------------|--------------------------------------|-----------------------------|-----------|--------------------------------------|-------------------------------------|
| L/D                                               | Near IR for 633 or 635<br>Excitation |                             |           | 1                                    | L34976,<br>Thermo Fisher Scientific |
| CD4                                               |                                      | BUV805                      | SK3       | 4                                    | 564910, BD                          |
| CD183                                             | CXCR3                                | BV421                       | 1C6/CXCR3 | 3                                    | 562558, BD                          |
| CD45RA                                            |                                      | Pacific Blue                | HI100     | 2                                    | 304123,<br>Biolegend                |
| CD3                                               |                                      | BV510                       | HIT3a     | 3                                    | 564713, BD                          |
| CD8                                               |                                      | BV650                       | RPA-T8    | 1                                    | 301042,<br>Biolegend                |
| CD127                                             | IL-7R                                | BV711                       | A019D5    | 4                                    | 351328,<br>Biolegend                |
| CD25                                              | IL-2RA                               | BB515                       | 2A3       | 3                                    | 564467, BD                          |
| CD45RO                                            |                                      | PE-CF594                    | UCHL1     | 2                                    | 562299, BD                          |
| CD196                                             | CCR6                                 | PE-Cy7                      | 11A9      | 4                                    | 560620, BD                          |
| CD194                                             | CCR4                                 | APC                         | L291H4    | 2                                    | 359408,<br>Biolegend                |
| <b>Sorter configuration used for this project</b> |                                      |                             |           |                                      |                                     |
| <b>Excitation</b>                                 |                                      | <b>Denomination in DIVA</b> |           | <b>Fluorochromes</b>                 |                                     |
| UV Laser 355nm                                    |                                      | U785LP                      |           | BUV805                               |                                     |
|                                                   |                                      | U380/14                     |           | BUV395                               |                                     |
| Violet Laser 405nm                                |                                      | V775/50                     |           | BV786                                |                                     |
|                                                   |                                      | V730/45                     |           | BV711                                |                                     |
|                                                   |                                      | V661/11                     |           | BV650                                |                                     |
|                                                   |                                      | V610/20                     |           | BV605/BV610                          |                                     |
|                                                   |                                      | V525/50                     |           | BV510                                |                                     |
|                                                   |                                      | V460/36                     |           | Pacific blue#                        |                                     |
|                                                   |                                      | V427/10                     |           | V450, BV421#                         |                                     |
| Blue Laser 488nm                                  |                                      | B710/50                     |           | PerCP                                |                                     |
|                                                   |                                      | B530/30                     |           | FITC                                 |                                     |
| Yellow Green Laser 561nm                          |                                      | Y775/50                     |           | PE-Cy7, PEVio770                     |                                     |
|                                                   |                                      | Y670/14                     |           | PE-Cy5                               |                                     |
|                                                   |                                      | Y610/20                     |           | PE-CF594                             |                                     |
|                                                   |                                      | Y586/15                     |           | PE                                   |                                     |
| Red Laser 640nm                                   |                                      | R775/50                     |           | APC-Cy7                              |                                     |
|                                                   |                                      | R730/45                     |           | Alexa Fluor 700                      |                                     |
|                                                   |                                      | R670/14                     |           | APC, AI647                           |                                     |

270

271 Note, #, the reason to provide the configuration setting is because we once used these two sorting  
272 markers with very close emission spectra for that specific project. For the gating strategy, please  
273 refer to Supplementary Fig. 6.
